# Supplementary material
Source: PubMed Central journal article supplement (PMC2766660)
Supplement: NIHMS134420-supplement-supporting_Info.pdf [file NIHMS134420-supplement-supporting_Info.pdf]

## Water-soluble Ag Nanoclusters Exhibit Strong Two-Photon-Induced Fluorescence

Sandeep A. Patel, Chris I. Richards, Jung-Cheng Hsiang and Robert M. Dickson\*

*School of Chemistry and Biochemistry and Petit Institute of Bioengineering and Bioscience,  
Georgia Institute of Technology, Atlanta, GA 30332-0400.*

### Supporting Information

#### References

- (3) Albota, M.; Beljonne, D.; Bredas, J. L.; Ehrlich, J. E.; Fu, J. Y.; Heikal, A. A.; Hess, S. E.; Kogej, T.; Levin, M. D.; Marder, S. R.; Mccord-Maughon, D.; Perry, J. W.; Rockel, H.; Rumi, M.; Subramaniam, C.; Webb, W. W.; Wu, X. L.; Xu, C., *Science* **1998**, 281, (5383), 1653-1656.
- (4) Chung, S. J.; Zheng, S. J.; Odani, T.; Beverina, L.; Fu, J.; Padilha, L. A.; Biesso, A.; Hales, J. M.; Zhan, X. W.; Schmidt, K.; Ye, A. J.; Zojer, E.; Barlow, S.; Hagan, D. J.; Van Stryland, E. W.; Yi, Y. P.; Shuai, Z. G.; Pagani, G. A.; Bredas, J. L.; Perry, J. W.; Marder, S. R., *J. Am. Chem. Soc.* **2006**, 128, (45), 14444-14445.
